# PEEP-induced Discrepancy Between Pulmonary Arterial Wedge Pressure and Left Atrial Pressure:

## *The Effects of Controlled vs. Spontaneous Ventilation and Compliant vs. Noncompliant Lungs in the Dog*

Richard E. Berryhill, M.D.,\* and Jonathan L. Benumof, M.D.†

Pulmonary-artery (PA) wedge pressure ( $P_{\text{paw}}$ ) is usually considered to be an accurate reflection of left atrial pressure ( $P_{\text{la}}$ ). Recent reports had demonstrated that during controlled positive-pressure ventilation (CV) in normal lungs, a progressive increase in positive end-expiratory pressure (PEEP) produced a progressive positive  $P_{\text{paw}}-P_{\text{la}}$  discrepancy when the PA catheter tip was positioned vertically above the left atrium (LA). In seven anesthetized dogs the  $P_{\text{paw}}-P_{\text{la}}$  relationship (as transmural pressures) was studied at PEEP = 0, 5, 10, 15, and 20 torr, in two ways: 1) in compliant lungs with the PA catheter tip above the LA, CV was compared with spontaneous ventilation (SV); 2) during CV with PA catheter tip both above ( $C_{\text{up}}$ ) and below ( $C_{\text{down}}$ ) the LA compliant lungs were compared with noncompliant lungs. A 35 per cent decrease in static pulmonary compliance was induced by administering oleic acid, 0.06 ml/kg, intravenously, and 0.01N HCl, 5 ml, intratracheally. In compliant lungs with the PA catheter tip above the LA during CV,  $P_{\text{paw}}$  was significantly greater than  $P_{\text{la}}$  at PEEP  $\geq 5$  torr and equalled PEEP when PEEP  $\geq 10$  torr, whereas during SV,  $P_{\text{paw}}$  did not differ significantly from  $P_{\text{la}}$  at any PEEP. During CV in compliant lung,  $P_{\text{paw}}$  recorded from  $C_{\text{up}}$  and  $C_{\text{down}}$  was significantly greater than  $P_{\text{la}}$  at PEEP  $\geq 5$  and PEEP  $\geq 15$  torr, respectively. During CV in noncompliant lung,  $P_{\text{paw}}$  recorded from  $C_{\text{up}}$  and  $C_{\text{down}}$  was significantly greater than  $P_{\text{la}}$  at PEEP  $\geq 10$  and PEEP  $\geq 15$  torr, respectively. The  $P_{\text{paw}}-P_{\text{la}}$  difference from  $C_{\text{up}}$  at PEEP  $\geq 10$  torr was significantly less in noncompliant lung than in compliant lung. It is concluded that SV affords complete protection of the  $P_{\text{paw}}-P_{\text{la}}$  relationship even at high PEEP, whereas a decrease in pulmonary compliance affords moderate protection of the  $P_{\text{paw}}-P_{\text{la}}$  relationship. These results are important because they further our ability to assess the accuracy of  $P_{\text{paw}}$  during varying clinical situations. (Key words: Equipment, catheters, Swan-Ganz, Heart, vascular pressures. Lung, compliance; intravascular pressures. Ventilation: pattern; mechanical; spontaneous; positive end-expiratory pressure.)

PULMONARY-ARTERY WEDGE PRESSURE ( $P_{\text{paw}}$ ) is considered to be an accurate reflection of left atrial pressure ( $P_{\text{la}}$ ) provided there is a continuous column of fluid between the wedged pulmonary-artery catheter tip and the left atrium (Zone III, a region within the

lung where pulmonary arterial pressure [ $P_a$ ] exceeds pulmonary venous pressure [ $P_v$ ], which in turn exceeds alveolar pressure [ $P_A$ ],  $P_a > P_v > P_A$ <sup>1-3</sup>). Positive end-expiratory pressure (PEEP) can result in intermittent collapse (Zone II,  $P_a > P_A > P_v$ ) and perhaps continuous collapse (Zone I,  $P_A > P_a > P_v$ ) of this column of fluid, depending upon 1) the magnitude of the change in transpulmonary pressure secondary to PEEP; 2) the vertical hydrostatic gradient between the wedged pulmonary-artery catheter tip and left atrium; 3) the transmission of PEEP to the pulmonary vasculature as a function of pulmonary parenchymal compliance; 4) the pressure changes occurring in the pleural space during the ventilatory cycle. A recent study demonstrated, in dogs with normal lungs and normal  $P_{\text{la}}$  during controlled positive-pressure ventilation, that a progressive increase in PEEP  $\geq 5$  torr produced a progressive positive discrepancy between  $P_{\text{paw}}$  and  $P_{\text{la}}$  (i.e.,  $P_{\text{paw}} > P_{\text{la}}$ ) when the pulmonary-artery catheter was wedged above the level of the left atrium.<sup>4</sup> We questioned how changes in the ventilatory pattern and pulmonary compliance would affect this previously described PEEP-induced  $P_{\text{paw}}-P_{\text{la}}$  discrepancy. The purpose of this study was to examine quantitatively the relationship between  $P_{\text{paw}}$  and  $P_{\text{la}}$  as a function of PEEP during controlled ventilation compared with spontaneous ventilation and in compliant compared with noncompliant lungs.

### Methods

Seven mongrel dogs, weighing 16 to 23 kg, were anesthetized with pentobarbital, 25 mg/kg, intravenously (iv), tracheally intubated, paralyzed with pancuronium, 0.1 mg/kg, iv, and mechanically ventilated with oxygen ( $FI_{O_2} = 1.0$ ) at a tidal volume of 15 ml/kg and a ventilatory rate so that end-tidal  $CO_2 = 5$  per cent (Beckman LB-2). Anesthesia was maintained with pentobarbital, 2-3 mg/kg, iv, every hour. The animals were placed in the right lateral decubitus position. A left thoracotomy was performed for placement of left atrial and pleural catheters. While the chest was open, two transcutaneously passed (via the femoral veins) triple-lumen balloon-tipped pulmonary-artery catheters (Edwards #93-113-7F) were

\* Resident III.

† Associate Professor of Anesthesia.

Received from the Anesthesia Research Laboratory of the University of California, San Diego, La Jolla, California 92093. Accepted for publication February 22, 1979. Supported by NIH Grant #USPHS GM 24674-01.

Address reprint requests to Dr. Benumof: Anesthesia Research Laboratory, M-004, University of California, San Diego, La Jolla, California 92093.

TABLE 1. Pulmonary Vascular Pressure and Cardiac Output during Controlled vs. Spontaneous Ventilation in Compliant Lung

| PEEP<br>(torr) | Controlled Ventilation     |                           |                           | Spontaneous Ventilation    |                           |                           |
|----------------|----------------------------|---------------------------|---------------------------|----------------------------|---------------------------|---------------------------|
|                | P <sub>paw</sub><br>(torr) | P <sub>la</sub><br>(torr) | Q <sub>t</sub><br>(l/min) | P <sub>paw</sub><br>(torr) | P <sub>la</sub><br>(torr) | Q <sub>t</sub><br>(l/min) |
| 0              | 6.5 ± 0.7                  | 5.5 ± 0.7                 | 4.1 ± 0.2                 | 7.3 ± 0.7                  | 5.7 ± 0.6                 | 5.0 ± 0.5                 |
| 5              | 7.8 ± 0.8*                 | 5.1 ± 0.7                 | 4.4 ± 0.3                 | 7.3 ± 1.1                  | 5.4 ± 0.7                 | 4.7 ± 0.4                 |
| 10             | 9.4 ± 1.0*                 | 4.9 ± 0.6                 | 3.3 ± 0.3†                | 8.0 ± 0.8                  | 6.2 ± 0.5                 | 4.5 ± 0.4                 |
| 15             | 13.4 ± 1.0*                | 5.0 ± 0.6                 | 2.4 ± 0.2†                | 8.9 ± 1.0                  | 7.0 ± 1.1                 | 4.2 ± 0.4                 |
| 20             | 19.0 ± 1.6*                | 5.8 ± 0.7                 | 1.6 ± 0.1†                | 9.8 ± 2.0                  | 8.1 ± 2.0                 | 3.9 ± 0.6†‡               |

PEEP = positive end-expiratory pressure; P<sub>paw</sub> = transmural pulmonary arterial wedge pressure; P<sub>la</sub> = transmural left atrial pressure; Q<sub>t</sub> = cardiac output.

\*  $P < 0.01$ , significantly greater than P<sub>la</sub>.

†  $P < 0.01$ , significantly less than Q<sub>t</sub> at PEEP = 0.

‡  $P < 0.01$ , significantly greater than Q<sub>t</sub> at PEEP = 20 torr during controlled ventilation.

guided from within the chest so that when wedged via balloon inflation one catheter was positioned 2.5–3.5 cm (3.2 cm ± 0.2 SE) above (C<sub>up</sub>) the left atrial catheter and one catheter was positioned 2.0–2.5 cm (2.3 cm ± 0.1 SE) below (C<sub>down</sub>) the left atrial catheter. The chest was then closed and the pneumothorax evacuated. Pertinent measured pressures were P<sub>paw</sub> from C<sub>up</sub> and C<sub>down</sub>, P<sub>la</sub>, airway (P<sub>aw</sub>) and pleural (P<sub>pl</sub>). All pressure transducers (Hewlett-Packard 1280 C) were calibrated with standard mercury manometers and were referenced to atmosphere at the level of the left atrium. All pressures were recorded in torr at end expiration (Hewlett-Packard eight-channel recorder), and all pulmonary vascular and left atrial pressures are expressed as mean transmural pressure (relative to P<sub>pl</sub>) ± SE. Static pulmonary compliance was measured during paralysis after 7 sec of inflation from functional residual capacity to volumes of 15 and 30 ml/kg and was calculated as static pulmonary compliance = inflated tidal volume/P<sub>aw</sub> – P<sub>pl</sub>. Changes in static pulmonary compliance were effected by administration of oleic acid, 0.06 ml/kg, iv, and 0.01 N HCl, 5 ml, intratracheally.

The experimental sequence in each animal consisted of measurement of P<sub>paw</sub> from C<sub>up</sub> and C<sub>down</sub> and P<sub>la</sub> at PEEP = 0, 5, 10, 15, and 20 torr during the following steps in order of: a) paralysis and con-

trolled ventilation; b) spontaneous ventilation (following reversal of paralysis with neostigmine, 0.08 mg/kg, and atropine, 0.02 mg/kg, iv); c) paralysis and controlled ventilation in lungs damaged by oleic and hydrochloric acids. Comparison was made of 1) transmural P<sub>paw</sub> from C<sub>up</sub> only and transmural P<sub>la</sub> between steps a and b (controlled vs. spontaneous ventilation, n = six dogs); 2) transmural P<sub>paw</sub> from both C<sub>up</sub> and C<sub>down</sub> and transmural P<sub>la</sub> between steps a and c (compliant vs. noncompliant lungs, n = seven dogs). Results were analyzed by t test for paired data, with  $P < 0.01$  considered significant.

The following procedures were performed at the following times. Step c was performed three hours after the administration of oleic acid and HCl. Static pulmonary compliance was measured during steps a and c. Arterial blood-gas and pH analyses were performed at the beginning of steps a, b and c. Thermo-dilution cardiac output (Q<sub>t</sub>) was determined at all levels of PEEP and during all experimental steps. Steps a, b and c each took approximately 60 min to complete. Dextrose, 5 per cent, in lactated Ringer's solution was administered iv at a maintenance rate only.

## Results

### CONTROLLED VS. SPONTANEOUS VENTILATION IN COMPLIANT LUNG

Transmural P<sub>la</sub> did not change significantly at any level of PEEP during controlled or spontaneous ventilation (table 1). During controlled ventilation P<sub>paw</sub> (from C<sub>up</sub> only in this section) was significantly greater than P<sub>la</sub> at PEEP ≥ 5 torr, and at PEEP ≥ 10 torr P<sub>paw</sub> closely reflected PEEP. During spontaneous ventilation P<sub>paw</sub> did not differ significantly from P<sub>la</sub> at any level of PEEP. Q<sub>t</sub> decreased significantly at PEEP values of 10 torr or more during controlled ventilation, but only at 20 torr during spontaneous ventilation. However, Q<sub>t</sub> at PEEP = 20 torr was significantly

TABLE 2. Pleural and Transpulmonary Pressures during Controlled vs. Spontaneous Ventilation in Compliant Lung

| PEEP<br>(torr) | Controlled Ventilation    |                           | Spontaneous Ventilation   |                           |
|----------------|---------------------------|---------------------------|---------------------------|---------------------------|
|                | P <sub>pl</sub><br>(torr) | P <sub>tp</sub><br>(torr) | P <sub>pl</sub><br>(torr) | P <sub>tp</sub><br>(torr) |
| 0              | -3.4 ± 0.5                | 3.4 ± 0.5                 | -2.5 ± 0.7                | 2.5 ± 0.7                 |
| 5              | -1.1 ± 0.6                | 6.1 ± 0.6                 | 0.5 ± 0.6                 | 4.2 ± 0.5                 |
| 10             | 1.2 ± 0.6                 | 8.8 ± 0.6                 | 4.3 ± 0.6                 | 5.7 ± 0.6                 |
| 15             | 2.2 ± 0.8                 | 11.9 ± 0.7                | 7.8 ± 0.7                 | 7.2 ± 0.7                 |
| 20             | 4.7 ± 0.7                 | 15.3 ± 0.7                | 11.3 ± 1.6                | 8.7 ± 1.6                 |

PEEP = positive end-expiratory pressure; P<sub>pl</sub> = pleural pressure; P<sub>tp</sub> = transpulmonary pressure.

greater during spontaneous ventilation compared with controlled ventilation.  $P_{pl}$  relative to atmospheric pressure and transpulmonary pressures ( $P_{tp}$ ) recorded at each level of PEEP during both controlled ventilation and spontaneous ventilation are shown in table 2. The most striking observation was that  $P_{tp}$  was much greater during controlled ventilation than during spontaneous ventilation. With increasing PEEP, the difference between  $P_{paw}$  and  $P_{la}$ , ( $P_{paw-la}$ ) progressively increased during controlled ventilation (fig. 1). Using  $P_{pl}$  at end expiration as the reference pressure, the  $P_{pl}$  at peak inspiration during controlled ventilation at PEEP = 0, 5, 10, 15, and 20 torr increased by  $4 \pm 0$ ,  $3 \pm 0$ ,  $2 \pm 0$ ,  $2 \pm 0$ , and  $2 \pm 0$  torr, respectively, whereas  $P_{pl}$  at peak inspiration during spontaneous ventilation decreased by  $10 \pm 2$ ,  $12 \pm 1$ ,  $16 \pm 1$ ,  $20 \pm 1$ , and  $24 \pm 2$  torr, respectively. During spontaneous ventilation end-tidal  $CO_2$  values at PEEP = 0, 5, 10, 15, and 20 torr were  $5.0 \pm 0.1$ ,  $5.7 \pm 0.2$ ,  $6.3 \pm 0.1$ ,  $7.1 \pm 0.1$ , and  $7.8 \pm 0.2$  per cent, respectively. During controlled ventilation end-tidal  $CO_2$  was constant at 5 per cent.

#### CONTROLLED VENTILATION IN COMPLIANT LUNG VS. NON-COMPLIANT LUNG

Static pulmonary compliances in compliant lung at 15 and 30 ml/kg were  $51 \pm 9$  and  $65 \pm 8$  ml/torr, respectively, and in noncompliant lung,  $32 \pm 2$  and  $46 \pm 4$  ml/torr, respectively. Transmural  $P_{la}$  did not change significantly at any PEEP in compliant or non-compliant lung (table 3). In compliant lung when PEEP = 5 torr and was progressively increased to 20 torr,  $P_{paw}$  from  $C_{up}$  was progressively greater than  $P_{paw}$  from  $C_{down}$ . In noncompliant lung when PEEP = 10 torr and was progressively increased to 20 torr,  $P_{paw}$  from  $C_{up}$  was progressively greater than  $P_{paw}$  from  $C_{down}$ , but the difference between  $C_{up}$  and  $C_{down}$  was less in noncompliant lung than in compliant lung. In compliant lung  $P_{paw}$  recorded from  $C_{up}$  and  $C_{down}$  was significantly greater than  $P_{la}$  at PEEP  $\geq 5$  and

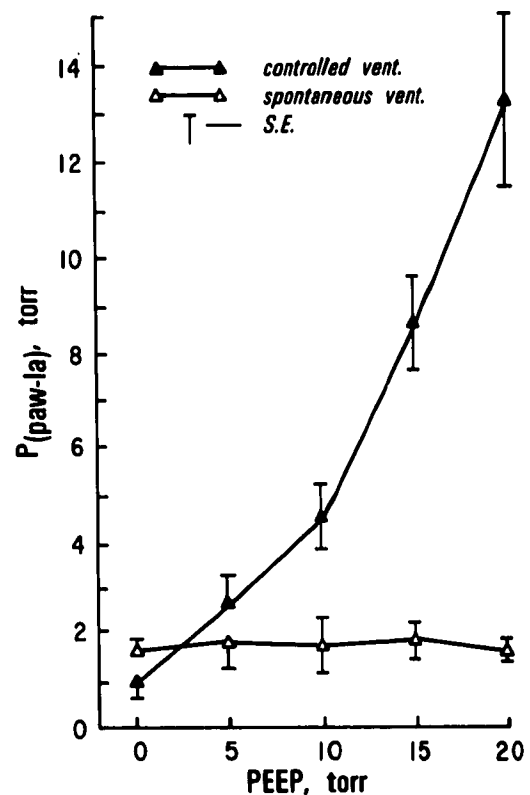

FIG. 1. PEEP = positive end-expiratory pressure.  $P_{paw-la}$  = transmural pulmonary arterial wedge pressure - transmural left atrial pressure.

PEEP  $\geq 15$  torr, respectively. In noncompliant lung, however,  $P_{paw}$  recorded from  $C_{up}$  and  $C_{down}$  was significantly greater than  $P_{la}$  at PEEP  $\geq 10$  torr and PEEP  $\geq 15$  torr, respectively.  $P_{paw-la}$  from  $C_{up}$  in noncompliant lung was significantly less than  $P_{paw-la}$  from  $C_{up}$  in compliant lung at PEEP  $\geq 10$  torr (fig. 2).  $P_{paw-la}$  from  $C_{down}$  was not significantly different between compliant and noncompliant lung at any level of PEEP.  $P_{pl}$  relative to atmospheric pressure and  $P_{tp}$  recorded at each level of PEEP in both compliant lung and noncompliant lung are shown in table 4.  $\dot{Q}_t$  was

TABLE 3. Pulmonary Vascular Pressure in Compliant vs. Noncompliant Lung during Controlled Ventilation

| PEEP<br>(torr) | Compliant Lung     |                        |                          | Noncompliant Lung  |                           |                          |
|----------------|--------------------|------------------------|--------------------------|--------------------|---------------------------|--------------------------|
|                | $P_{la}$<br>(torr) | $P_{paw}$ Up<br>(torr) | $P_{paw}$ Down<br>(torr) | $P_{la}$<br>(torr) | $P_{paw}$ Up<br>(torr)    | $P_{paw}$ Down<br>(torr) |
| 0              | $5.6 \pm 0.6$      | $6.9 \pm 0.7$          | $6.7 \pm 0.7$            | $6.3 \pm 0.8$      | $6.8 \pm 0.8$             | $7.0 \pm 0.9$            |
| 5              | $5.1 \pm 0.6$      | $7.9 \pm 0.7^*$        | $6.1 \pm 0.6$            | $5.1 \pm 0.8$      | $6.6 \pm 0.7$             | $5.6 \pm 0.8$            |
| 10             | $5.3 \pm 0.6$      | $9.6 \pm 0.9^*$        | $6.6 \pm 0.8$            | $5.4 \pm 0.7$      | $7.2 \pm 0.7^{*\dagger}$  | $6.2 \pm 0.7$            |
| 15             | $5.5 \pm 0.7$      | $13.9 \pm 1.0^*$       | $9.1 \pm 1.0^*$          | $6.2 \pm 0.6$      | $9.9 \pm 0.8^{*\dagger}$  | $8.1 \pm 1.0^*$          |
| 20             | $6.4 \pm 0.9$      | $19.6 \pm 1.4^*$       | $12.5 \pm 1.5^*$         | $6.7 \pm 0.8$      | $14.6 \pm 1.1^{*\dagger}$ | $10.4 \pm 0.9^*$         |

PEEP = positive end-expiratory pressure;  $P_{la}$  = transmural left atrial pressure;  $P_{paw}$  Up = transmural pulmonary arterial wedge pressure catheter above left atrium;  $P_{paw}$  Down = transmural

pulmonary arterial wedge pressure, catheter below left atrium.

\*  $P < 0.01$ , significantly greater than  $P_{la}$ .

†  $P < 0.01$ , significantly less than  $P_{paw}$  Up in compliant lung.

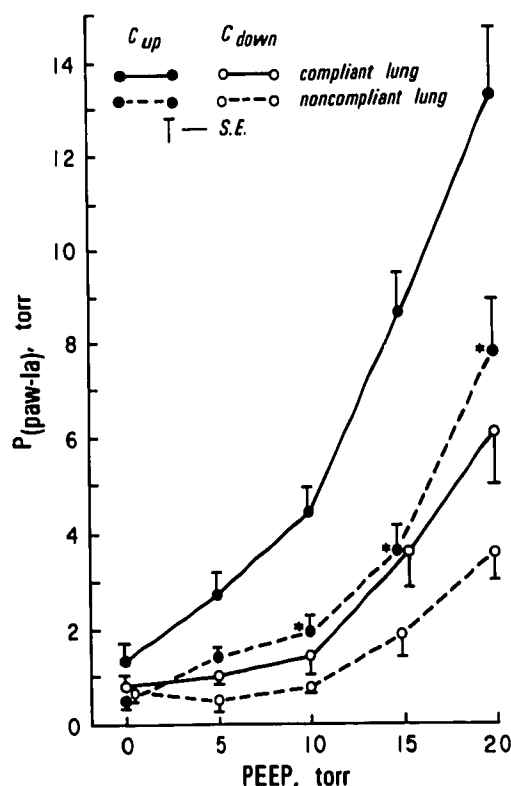

FIG. 2. See figure 1. \* $P < 0.01$ , significantly less than  $P_{\text{paw-la}}$  from  $C_{\text{up}}$  in compliant lung.  $C_{\text{up}}$  = pulmonary arterial catheter positioned above left atrium;  $C_{\text{down}}$  = pulmonary arterial catheter positioned below left atrium.

significantly decreased at  $\text{PEEP} \geq 10$  torr compared with  $\text{PEEP} = 0$  in compliant and noncompliant lung, but  $\dot{Q}_l$  from  $C_{\text{up}}$  and  $C_{\text{down}}$  did not differ at any level of PEEP in compliant or noncompliant lung. At  $\text{PEEP} = 0$ , arterial blood-gas and pH values were  $\text{PaO}_2 = 436 \pm 38$  torr,  $\text{PaCO}_2 = 38 \pm 2$  torr,  $\text{pH} = 7.34 \pm 0.02$ , and  $\text{PaO}_2 = 137 \pm 29$  torr,  $\text{PaCO}_2 = 42 \pm 2$  torr,  $\text{pH} = 7.31 \pm 0.04$  in compliant and noncompliant lung, respectively. In view of a normal cardiac output, this corresponds to estimated right-to-left intrapulmonary

shunts of 12 and 27 per cent for compliant and noncompliant lung, respectively, at  $\text{PEEP} = 0$ .

### Discussion

The necessity for  $P_{\text{paw}}$  to reflect  $P_{\text{la}}$  accurately during the treatment of critically ill patients is crucial, for if incorrect  $P_{\text{paw}}$  values are chosen, inappropriate fluid management and use of cardiotoxic or vasoactive drugs can occur. The principal findings of this study were that during increasing levels of PEEP, a) spontaneous ventilation afforded complete protection of the accuracy of  $P_{\text{paw}}$  as a reflection of  $P_{\text{la}}$ , and b) noncompliant lung afforded moderate protection of the accuracy of  $P_{\text{paw}}$  as a reflection of  $P_{\text{la}}$ . Consideration should be given to both of these findings.

During spontaneous ventilation in compliant lungs, although the PA catheter was located above the left atrial level,  $P_{\text{paw}}$  remained an accurate reflection of  $P_{\text{la}}$  even with PEEP as high as 20 torr. This contrasts sharply with the large PEEP-induced discrepancy in  $P_{\text{paw}} - P_{\text{la}}$  that occurred during controlled ventilation and high levels of PEEP.

A recent experiment in which  $P_{\text{tp}}$  (and therefore lung volume) was allowed to increase or was kept constant during progressive increases in PEEP<sup>5</sup> provides a probable mechanism for this dramatic difference. When progressively increasing PEEP was applied and  $P_{\text{tp}}$  was allowed to increase, changes in  $P_{\text{pl}}$  were minimal and changes in alveolar pressure caused  $P_{\text{paw}}$  to become progressively greater than  $P_{\text{la}}$ . When progressively increasing PEEP was applied and  $P_{\text{tp}}$  was kept constant, the changes in  $P_{\text{pl}}$  were large and were equally transmitted to  $P_{\text{paw}}$  and  $P_{\text{la}}$  so that  $P_{\text{paw}}$  always remained an accurate reflection of  $P_{\text{la}}$ .

In our experiment, we found  $P_{\text{tp}}$  during controlled ventilation to be always greater than  $P_{\text{tp}}$  during spontaneous ventilation at each level of PEEP. During spontaneous ventilation, the animals had to increase their efforts to exhale against the higher levels of PEEP, and thereby increased  $P_{\text{pl}}$  at end expiration. This accounts for the lesser increase in  $P_{\text{tp}}$  as PEEP increased during spontaneous ventilation compared with controlled ventilation. Under circumstances in which pulmonary compliance is not changing, lung volume is directly related to  $P_{\text{tp}}$ . The relative distribution of Zones I, II, and III throughout the lung is dependent upon instantaneous lung volume and pulmonary blood volume. Because  $P_{\text{tp}}$  (and therefore lung volume) increased to a much lesser extent during spontaneous ventilation compared with controlled ventilation, the relative distribution of Zones I, II, and III was minimally changed even though the absolute airway pressure (PEEP being relative to atmosphere)

TABLE 4. Pleural and Transpulmonary Pressures in Compliant vs. Noncompliant Lung during Controlled Ventilation

| PEEP (torr) | Compliant Lung         |                        | Noncompliant Lung      |                        |
|-------------|------------------------|------------------------|------------------------|------------------------|
|             | $P_{\text{pl}}$ (torr) | $P_{\text{tp}}$ (torr) | $P_{\text{pl}}$ (torr) | $P_{\text{tp}}$ (torr) |
| 0           | $-3.0 \pm 0.6$         | $3.0 \pm 0.6$          | $-2.8 \pm 0.4$         | $2.8 \pm 0.4$          |
| 5           | $-1.2 \pm 0.5$         | $6.2 \pm 0.5$          | $-0.9 \pm 0.4$         | $5.9 \pm 0.4$          |
| 10          | $0.9 \pm 0.6$          | $7.7 \pm 1.3$          | $1.4 \pm 0.5$          | $8.5 \pm 0.5$          |
| 15          | $2.9 \pm 0.7$          | $12.2 \pm 0.7$         | $3.2 \pm 0.6$          | $11.8 \pm 0.6$         |
| 20          | $4.2 \pm 0.8$          | $15.8 \pm 0.8$         | $4.3 \pm 0.7$          | $15.7 \pm 0.7$         |

PEEP = positive end-expiratory pressure;  $P_{\text{pl}}$  = pleural pressure;  $P_{\text{tp}}$  = transpulmonary pressure.

was high at end expiration. We suggest, then, that it is the magnitude of the change in  $P_{tp}$  (and therefore lung volume) caused by PEEP that is responsible for the accuracy or discrepancy of the  $P_{paw}-P_{la}$  relationship, rather than the absolute magnitude of PEEP. We speculate that at end expiration during spontaneous ventilation with increasing PEEP, if  $P_{tp}$  increased to the same extent as during controlled ventilation, a  $P_{paw}-P_{la}$  gradient would develop. Additionally, cardiac output during spontaneous ventilation did not decrease significantly until PEEP was 20 torr, which maintained pulmonary blood volume (the second determinant of distribution of lung zones).

We found that increasing PEEP during controlled ventilation caused cardiac output to decrease while  $P_{la}$  remained constant, which indicates a decrease in myocardial contractility. The decrease in myocardial contractility may have been caused by an increase in right ventricular end-diastolic pressure, which in turn may have caused a shift in the interventricular septum, which in turn may have caused a change in left ventricular geometry and compliance and left ventricular end-diastolic pressure and therefore,  $P_{la}$ .<sup>6-8</sup>

Our results confirm a recent report that demonstrates a PEEP-induced discrepancy in  $P_{paw}-P_{la}$  in normal lungs during controlled positive-pressure ventilation with a progressive increase in PEEP when the pulmonary-artery catheter is located above the left atrium.<sup>4</sup> Our results show, however, that in the noncompliant lung the transmission of PEEP to the pulmonary microvasculature was decreased, and therefore the noncompliant lung "protected" to a moderate extent the accuracy of the  $P_{paw}$  measurement as a reflection of  $P_{la}$ . It is possible that the mechanism of the decreased transmission of PEEP in the noncompliant lung was due to the presence of channels between the tip of the pulmonary-artery catheter and the left atrium that were not exposed to alveolar pressure. Our calculations of right-to-left intrapulmonary shunt are compatible with this hypothesis. Thus, it may be that it is the increase in intrapulmonary shunting of blood that develops with oleic acid- and hydrochloric acid-induced lung injury and not specifically the decrease in pulmonary compliance that affords the moderate protection of the  $P_{paw}-P_{la}$  relationship in the noncompliant lung. In support of this hypothesis, it is possible that pulmonary compliance was in fact decreased in our dogs during controlled ventilation at high levels of PEEP in compliant lungs, and yet a large  $P_{paw}-P_{la}$  gradient developed.

For several reasons, our results indicate that a pulmonary-artery catheter tip (which is vertically stationary) can "physiologically ascend" within the lung from Zone III to Zone II and then higher in Zone

II as PEEP is progressively increased. First, in compliant lung the progressive divergence of  $P_{paw}$  from  $P_{la}$  as PEEP increased was greater in  $C_{up}$  than in  $C_{down}$ . Second, the same relative changes occurred in  $P_{paw}$  from  $C_{up}$  and  $C_{down}$  in noncompliant lung, but to a lesser extent. Third, the difference between the PEEP level (usually 5 torr) that first caused the  $P_{paw}-P_{la}$  to become significant when comparing  $C_{up}$  with  $C_{down}$  in both compliant and noncompliant lung approximated the vertical hydrostatic gradient between  $C_{up}$  and  $C_{down}$  of 5.5 cm.

The accuracy with which the  $P_{paw}$  reflects  $P_{la}$  during PEEP in the clinical setting, therefore, depends upon several factors. First, our results indicate that the vertical height difference between the pulmonary-artery catheter tip and the left atrium is important. Even when pulmonary-artery catheters have been floated to the most proximal position from which a  $P_{paw}$  and PA phasic pressure pattern can be obtained by balloon inflation and deflation, peripheral catheter placements have been reported.<sup>9</sup> Second, our data indicate that the relative amount of controlled positive-pressure ventilation compared with spontaneous ventilation, such as exists during intermittent mandatory ventilation (IMV), is an important consideration. These current findings suggest further studies to determine how variations in the IMV to spontaneous ventilatory rate ratio will affect the  $P_{paw}-P_{la}$  relationship, from which a family of curves could be developed for all levels of PEEP. Third, our results indicate that an increase in right-to-left intrapulmonary shunt appears to afford partial protection of the  $P_{paw}-P_{la}$  relationship. However, it should be noted that our animal model precluded the development of late pulmonary parenchymal changes such as extensive inflammatory cell infiltrates, formation of hyaline membranes, and early fibrosis. These changes might result in the development of an even greater intrapulmonary shunt and therefore greater protection of the  $P_{paw}-P_{la}$  relationship. Fourth, even if the PA catheter tip-to-LA vertical height relationship, the controlled-to-spontaneous ventilatory rate ratio, and the intrapulmonary shunt all remained constant, a decrease in  $P_{la}$  (*i.e.*, hemorrhage) could result in the development of a  $P_{paw}-P_{la}$  discrepancy. Last, during either controlled or spontaneous ventilation the magnitude of the change in  $P_{tp}$  as influenced by PEEP relative to the above-mentioned factors is obviously a determinant of the accuracy of the  $P_{paw}-P_{la}$  relationship.

We conclude that the complete protection afforded the  $P_{paw}-P_{la}$  relationship by spontaneous ventilation at all levels of PEEP and the partial protection afforded the  $P_{paw}-P_{la}$  relationship by a moderate in-

crease in intrapulmonary shunt during increasing levels of PEEP presently increase our confidence in  $P_{\text{paw}}$  as an accurate reflection of  $P_{\text{ta}}$  in a variety of clinical situations.

The authors express their appreciation to Mr. Gary Maruschak for technical assistance.

### References

1. Bannister J, Torrence RW: The effect of the tracheal pressure upon flow: pressure relations in the vascular bed of isolated lungs. *Q J Exp Physiol* 45:352-367, 1960
2. Permutt S, Bromberger-Barnea B, Bone HN: Alveolar pressure, pulmonary venous pressure, and the vascular waterfall. *Med Thorac* 19:239-260, 1962
3. West JB, Dollery CT, Naimark A: Distribution of blood flow in isolated lung: Relation to vascular and alveolar pressures. *J Appl Physiol* 19:713-724, 1964
4. Roy R, Powers SR, Feustel PJ, et al: Pulmonary wedge catheterization during positive end-expiratory pressure ventilation in the dog. *ANESTHESIOLOGY* 46:385-390, 1977
5. Scharf SM, Caldini P, Ingram RH: Cardiovascular effects of increasing airway pressure in the dog. *Am J Physiol* 232: H35-H43, 1977
6. Taylor RR, Covell JW, Sonnenblick EH, et al: Dependence of ventricular distensibility on filling of the opposite ventricle. *Am J Physiol* 213:711-718, 1967
7. Mouloupoulos SD, Sarcas A, Stamateopoulos S: Left ventricular performance during bypass or distension of the right ventricle. *Circ Res* 17:484-491, 1965
8. Bemis CE, Serar Jr, Barkenhagen D, et al: Influence of right ventricular filling pressure on left ventricular pressure and dimension. *Circ Res* 34:498-504, 1975
9. Benumof JL, Saidman LJ, Arkin DB, et al: Where pulmonary arterial catheters go: Intrathoracic distribution. *ANESTHESIOLOGY* 46:336-338, 1977

### NOTICE TO COPIERS

*The appearance of the code at the bottom of the first page of an article in this journal indicates the copyright owner's consent that copies of the article may be made for personal or internal use, or for personal or internal use of specific clients. This consent is given on the condition, however, that the copier pay the stated per-copy fee through the Copyright Clearance Center, Inc., P. O. Box 765, Schenectady, New York 12301, for copying beyond that permitted by Sections 107 or 108 of the U. S. Copyright Law. This consent does not extend to other kinds of copying, such as copying for general distribution, for advertising or promotional purposes, for creating new collective works, or for resale.*
